# Supplementary material for: miR-380-5p-mediated repression of TEP1 and TSPYL5 interferes with telomerase activity and favours the emergence of an “ALT-like” phenotype in diffuse malignant peritoneal mesothelioma cells
Source: Springer Nature journal article supplement (doi:10.1186/s13045-017-0510-3), 2017-07-17
Supplement: MOESM1 [file 13310086]

## Additional File 1: Supplementary methods and Figure S1

### MiRNA expression profiling

MiRNA expression profiling was carried out on a series of 50 DMPM tissue specimens obtained from patients treated at our Institute between 1997 and 2009, 1 cell line derived from the tumour of a DMPM patient and in 6 normal samples (5 normal peritoneum specimens from patients who underwent surgery for non-oncologic disease and 1 human normal mesothelial cell line, MES-F). The study was approved by the Institutional Review Board and each patient provided written informed consent to donate to INT the leftover tissue after diagnostic and clinical procedures [5,13]. DMPM specimens were defined as TA-positive (n=25) or TA-negative (n=25) according to a previous screening for telomerase activity [5]. MiRNA expression profiling was carried out on the Illumina Human v2 microRNA expression beadchip (GPL8179) and raw data analyzed using Illumina BeadStudio v3.1.3 (Gene Expression Module v3.3.8). Methodological details may be found at GEO [GSE99362, <https://www.ncbi.nlm.nih.gov/geo/query/acc.cgi?acc=GSE99362>].

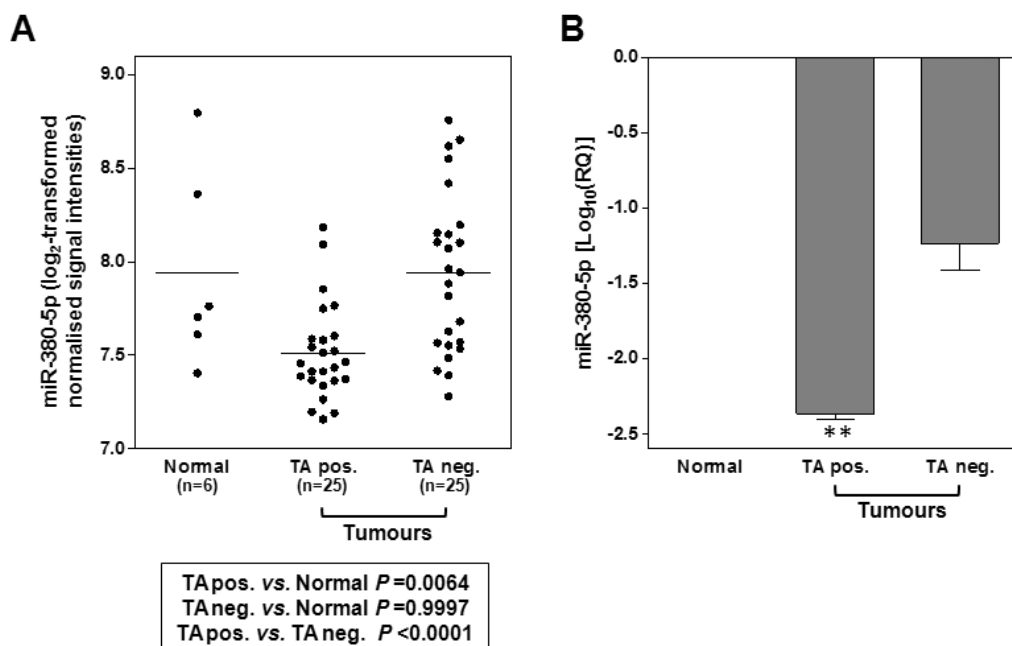

**Figure S1. miR-380-5p is significantly under-expressed in telomerase-positive DMPM tissue specimens.** (A) miR-380-5p endogenous expression levels assessed by miRNA expression profiling. Data have been reported as  $\log_2$ -transformed normalized signal intensities for miR-380-5p in each specimen. Horizontal lines represent the mean values of miR-380-5p expression levels in each group (normal vs. TA-positive vs. TA-negative specimens). (B) Real-time RT-PCR validation of endogenous miR-380-5p expression levels in normal samples, in TA-positive and TA-negative DMPM tissue specimens. Data have been reported as  $\log_{10}(\text{RQ})$  (mean values  $\pm$  s.d.) with respect to the average miRNA expression levels detected in normal samples, using the  $2^{-\Delta\Delta\text{Ct}}$  method. \*\* $P<0.01$  vs. TA-negative specimens (Student's t-test).
